# Supplementary material for: Spatial Distribution, Sources, Air–Soil Exchange, and Health Risks of Parent PAHs and Derivative-Alkylated PAHs in Different Functional Areas of an Oilfield Area in the Yellow River Delta, North China
Source: MDPI journal article supplement (doi:10.3390/toxics11060540), 2023-06-17
Supplement: s1 [file s1]

# Spatial distribution, Sources, Air-Soil Exchange, and Health Risks of Parent PAHs and Derivative-Alkylated PAHs in Different Functional Areas of an Oilfield Area in the Yellow River Delta, North China

Xiongfei Zhang <sup>a</sup>, Anan Qi <sup>a</sup>, Pengcheng Wang <sup>a</sup>, Qi Huang <sup>a</sup>, Tong Zhao<sup>a</sup>, Caiqing Yan <sup>a</sup>, Lingxiao Yang <sup>a,b,\*</sup> and Wenxing Wang <sup>a</sup>

## Captions of Tables and Figures

**Table S1.** Details for the sampling sites and sampling information.

**Table S2.** Abbreviation, and method detection limit for PAHs and APAHs in air (ng/m<sup>3</sup>) and soil (ng/g).

**Table S3.** Toxic equivalent factor (TEF) for individual PACs

**Table S4.** Incremental lifetime cancer risk assessment exposure parameters.

**Table S5.** Temperature dependent LogK<sub>oa</sub> of different PAHs and APAHs.

**Table S6.** Mean values of MEQ in air and soil samples in different functional areas.

**Figure S1.** The concentrations of individual PAHs at 24 sampling sites, (a) summer air(ng/m<sup>3</sup>); (b) winter air(ng/m<sup>3</sup>); (c) soil(ng/g).

**Figure S2.** The concentrations of individual APAHs at 24 sampling sites, (a) summer air(ng/m<sup>3</sup>); (b) winter air(ng/m<sup>3</sup>); (c) soil(ng/g).

**Figure S3.** Fugacity fractions (ff) for individual PAHs and APAHs in industrial (I), urban (U), agricultural (A), oil field (O), suburb (S), pump unit (P) and background (B) areas in (a)summer and (b) winter.

**Table S1.** Details for the sampling sites and sampling information.

| Functional Type | Site | Longitude(E) | Latitude(N) | Days Deployed (Summer/Winter) |
|-----------------|------|--------------|-------------|-------------------------------|
| Industrial      | I1   | 118°26'2"    | 37°59'33"   | 60/60                         |
|                 | I2   | 118°28'48"   | 37°55'17"   | 60/60                         |
|                 | I3   | 118°52'27"   | 38°5'53"    | 60/60                         |
|                 | I4   | 118°51'43"   | 38°4'59"    | 60/60                         |
|                 | I5   | 118°53'10"   | 38°3'0"     | 60/60                         |
| Urban           | U1   | 118°31'14"   | 37°52'34"   | 60/60                         |
|                 | U2   | 118°32'52"   | 37°51'53"   | 60/60                         |
|                 | U3   | 118°33'18"   | 37°50'13"   | 60/60                         |
| Agricultural    | A1   | 118°51'30"   | 37°42'23"   | 60/60                         |
|                 | A2   | 118°47'49"   | 37°42'2"    | 60/60                         |
|                 | A3   | 118°51'44"   | 37°39'59"   | 60/60                         |
| Oilfield        | O1   | 119°1'3"     | 37°54'53"   | 60/60                         |
|                 | O2   | 119°6'7"     | 37°53'35"   | 60/60                         |

|                   |    |            |           |       |
|-------------------|----|------------|-----------|-------|
|                   | O3 | 119°3'17"  | 37°52'6"  | 60/60 |
| Suburban          | S1 | 118°50'49" | 37°56'41" | 60/60 |
|                   | S2 | 118°52'1"  | 37°55'59" | 60/60 |
|                   | S3 | 118°48'54" | 37°52'13" | 60/60 |
|                   | S4 | 118°48'0"  | 37°51'44" | 60/60 |
|                   | S5 | 118°50'44" | 37°41'49" | 60/60 |
| Near Pump<br>Unit | P1 | 118°48'41" | 37°53'38" | 60/60 |
|                   | P2 | 118°46'23" | 37°51'18" | 60/60 |
|                   | P3 | 118°48'5"  | 37°52'54" | 60/60 |
|                   | P4 | 118°48'43" | 37°50'42" | 60/60 |
| Background        | B  | 118°58'44" | 37°46'35" | 60/60 |

**Table S2.** Abbreviation, and method detection limit for PAHs and APAHs in air (ng/m<sup>3</sup>) and soil (ng/g).

| Compound                 | Abbreviations | Ring | MDL-Air<br>(ng/m <sup>3</sup> ) | MDL-Soil<br>(ng/g) |
|--------------------------|---------------|------|---------------------------------|--------------------|
| PAHs                     |               |      |                                 |                    |
| Biphenyl                 | BIP           | 2    | 0.002                           | 0.03               |
| Acenaphthylene           | ACY           | 3    | 0.001                           | 0.03               |
| Acenaphthene             | ACE           | 3    | 0.005                           | 0.10               |
| Fluorene                 | FLU           | 3    | 0.002                           | 0.03               |
| Phenanthrene             | PHE           | 3    | 0.001                           | 0.02               |
| Anthracene               | ANT           | 3    | 0.005                           | 0.10               |
| Fluoranthene             | FLT           | 4    | 0.005                           | 0.10               |
| Pyrene                   | PYR           | 4    | 0.005                           | 0.10               |
| Benzo(a)anthracene       | BaA           | 4    | 0.011                           | 0.20               |
| Chrysene                 | CHR           | 4    | 0.011                           | 0.20               |
| Benzo(b)fluoranthene     | BbF           | 5    | 0.029                           | 0.50               |
| Benzo(k)fluoranthene     | BkF           | 5    | 0.029                           | 0.50               |
| Benzo(e)pyrene           | BeP           | 5    | 0.015                           | 0.25               |
| Benzo(a)pyrene           | BaP           | 5    | 0.029                           | 0.50               |
| Indeno(1,2,3-cd)pyrene   | IcdP          | 5    | 0.049                           | 0.80               |
| Dibenzo(a,h)anthracene   | DahA          | 6    | 0.061                           | 1.00               |
| Benzo(g,h,i)perylene     | BghiP         | 6    | 0.049                           | 0.80               |
| Coronene                 | COR           | 7    | 0.125                           | 2.00               |
| APAHs                    |               |      |                                 |                    |
| 1-Methylphenanthrene     | 1M-NAP        |      | 0.002                           | 0.05               |
| 9-Methylphenanthrene     | 9M-PHE        |      | 0.027                           | 0.50               |
| 3,6-Dimethylphenanthrene | 3,6D-PHE      |      | 0.011                           | 0.20               |
| 1-Methylpyrene           | 1M-PYR        |      | 0.006                           | 0.10               |
| 5-Methylchrysene         | 5M-CHR        |      | 0.012                           | 0.20               |

**Table S3.** Toxic equivalent factor (TEF) for corresponding individual PACs

| Compound | TEF    |
|----------|--------|
| ACY      | 0.0010 |
| ACE      | 0.0010 |
| FLU      | 0.0010 |
| PHE      | 0.0010 |
| ANT      | 0.0100 |
| FLT      | 0.0010 |
| PYR      | 0.0010 |
| BaA      | 0.1000 |
| CHR      | 0.0100 |
| BbF      | 0.1000 |
| BkF      | 0.1000 |
| BaP      | 1.0000 |
| IcdP     | 0.1000 |
| DahA     | 1.0000 |
| BghiP    | 0.0100 |
| 1-MNAP   | 0.0025 |
| 1-MPYR   | 0.1000 |
| 5-MCHR   | 1.0000 |

**Table S4.** Parameters for the incremental lifetime cancer risk assessment.

| Exposure Parameter                                                      | Units                                                  | Value                | References                           |
|-------------------------------------------------------------------------|--------------------------------------------------------|----------------------|--------------------------------------|
| Carcinogenic Slope Factor of Inhalation<br>(CSF <sub>inhalation</sub> ) | (mg kg <sup>-1</sup> day <sup>-1</sup> ) <sup>-1</sup> | 3.85                 | (Hu et al., 2007; Peng et al., 2011) |
| Carcinogenic Slope Factor of Ingestion<br>(CSF <sub>ingestion</sub> )   | (mg kg <sup>-1</sup> day <sup>-1</sup> ) <sup>-1</sup> | 7.3                  | (Hu et al., 2007; Peng et al., 2011) |
| Carcinogenic Slope Factor of Dermal<br>(CSF <sub>dermal</sub> )         | (mg kg <sup>-1</sup> day <sup>-1</sup> ) <sup>-1</sup> | 25                   | (Hu et al., 2007; Peng et al., 2011) |
| Inhalation Rate (IR <sub>inhalation</sub> )                             | m <sup>3</sup> /day                                    | 20                   | (Ali, 2019)                          |
| Ingestion Rate (IR <sub>ingest</sub> )                                  | mg/day                                                 | 30                   | (USEPA, 2011)                        |
| Exposure Frequency (EF)                                                 | day/year                                               | 350                  | (Hu et al., 2007; Ali, 2019)         |
| Exposure Duration (ED)                                                  | year                                                   | 24                   | (USEPA, 2002)                        |
| Body Weight (BW)                                                        | kg                                                     | 70                   | (USEPA, 2002)                        |
| Average Lifespan of Human (AT)                                          | day                                                    | 25550                | (Wang et al., 2011)                  |
| Skin Area (SA)                                                          | cm <sup>2</sup> /day                                   | 5700                 | (BMEPRI, 2007; Peng et al., 2011)    |
| Skin Adherence Factor (SAF)                                             | mg/cm <sup>2</sup>                                     | 0.07                 | (BMEPRI, 2007; Peng, et al., 2011)   |
| Dermal Absorption Factor (ABS)                                          | -                                                      | 0.13                 | (USEPA, 2002)                        |
| Particle Emission Factor (PEF)                                          | m <sup>3</sup> /kg                                     | 1.36×10 <sup>9</sup> | (USEPA, 2002)                        |

**Table S5.** Temperature dependent LogKoa of different PAHs and APAHs.

| Compound | A     | B    | Summer<br>(T=292.16) | Winter<br>(T=270.29) |
|----------|-------|------|----------------------|----------------------|
| BIP      | -1.85 | 2313 | 6.07                 | 6.71                 |
| ACY      | -2.41 | 2681 | 6.77                 | 7.51                 |
| ACE      | -2.00 | 2409 | 6.25                 | 6.92                 |
| FLU      | -2.08 | 2462 | 6.35                 | 7.03                 |
| PHE      | -2.76 | 2918 | 7.22                 | 8.03                 |
| ANT      | -2.76 | 2918 | 7.22                 | 8.03                 |
| FLT      | -3.88 | 3661 | 8.64                 | 9.66                 |
| PYR      | -3.88 | 3661 | 8.64                 | 9.66                 |
| BaA      | -4.55 | 4099 | 9.48                 | 10.62                |
| CHR      | -4.55 | 4099 | 9.48                 | 10.62                |
| BbF      | -5.68 | 4847 | 10.92                | 12.26                |
| BkF      | -5.68 | 4847 | 10.92                | 12.26                |
| BeP      | -6.30 | 5259 | 11.70                | 13.16                |
| BaP      | -5.68 | 4847 | 10.92                | 12.26                |
| IcdP     | -6.80 | 5595 | 12.35                | 13.90                |
| DahA     | -6.34 | 5285 | 11.75                | 13.22                |
| BghiP    | -7.28 | 5912 | 12.95                | 14.59                |
| COR      | -8.22 | 6532 | 14.14                | 15.95                |
| 1M-NAP   | -1.55 | 2116 | 5.69                 | 6.28                 |
| 9M-PHE   | -3.17 | 3187 | 7.74                 | 8.62                 |
| 3,6D-PHE | -3.59 | 3463 | 8.27                 | 9.22                 |
| 1M-PYR   | -4.30 | 3936 | 9.17                 | 10.26                |
| 5M-CHR   | -4.96 | 4374 | 10.01                | 11.22                |

Notes:  $\text{LogKoa} = A + B/T$ ; The KOA of PAH and APAHs were obtained from (Harner, 2021), otherwise estimated by EPI-suite.

**Table S6.** Mean values of MEQ in air and soil samples in different functional areas.

| Functional area | Summer air (ng/m <sup>3</sup> ) | Winter air (ng/m <sup>3</sup> ) | Soil (ng/g) |
|-----------------|---------------------------------|---------------------------------|-------------|
| Industrial      | 0.094852                        | 1.004387                        | 3.950608    |
| Urban           | 0.057963                        | 0.748245                        | 4.206544    |
| Agricultural    | 0.044542                        | 0.374574                        | 3.906807    |
| Oilfield        | 0.050779                        | 0.821753                        | 19.2451     |
| Suburban        | 0.046505                        | 0.611221                        | 18.74586    |
| Pump unit       | 0.060128                        | 0.904332                        | 21.28262    |
| Background      | 0.043384                        | 0.119419                        | 1.562069    |

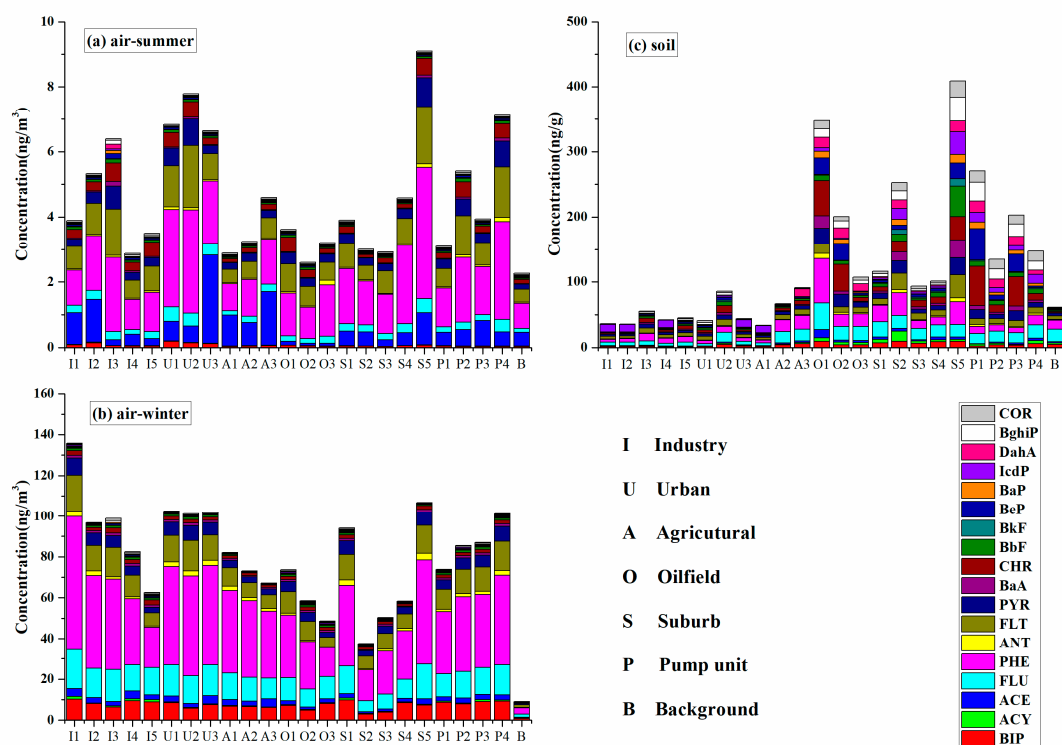

**Figure S1.** The concentrations of individual PAHs at the 24 sampling sites in (a) summer air ( $\text{ng}/\text{m}^3$ ); (b) winter air ( $\text{ng}/\text{m}^3$ ); and (c) soil ( $\text{ng}/\text{g}$ ).

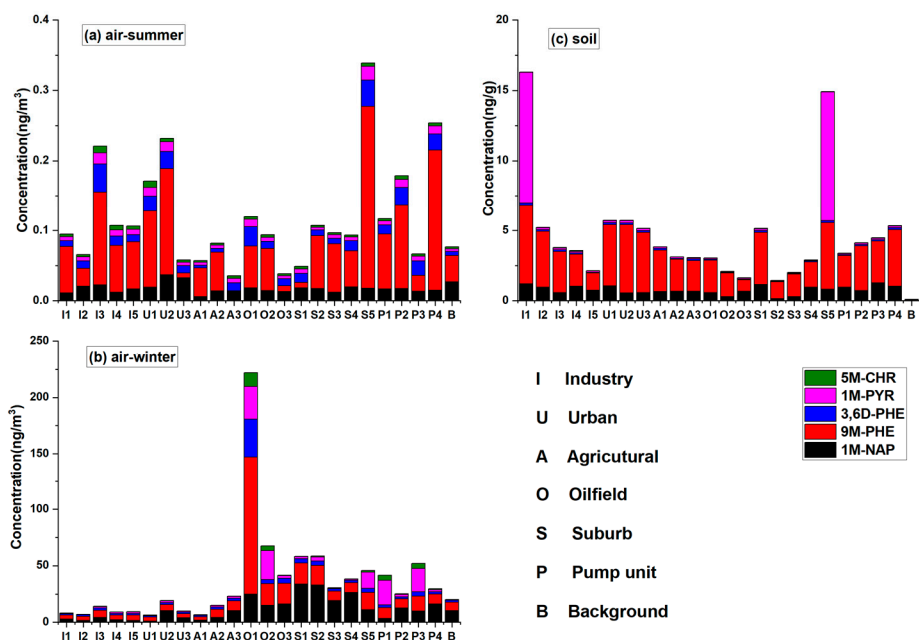

**Figure S2.** The concentrations of individual APAHs at the 24 sampling sites in (a) summer air ( $\text{ng}/\text{m}^3$ ); (b) winter air ( $\text{ng}/\text{m}^3$ ); and (c) soil ( $\text{ng}/\text{g}$ ).

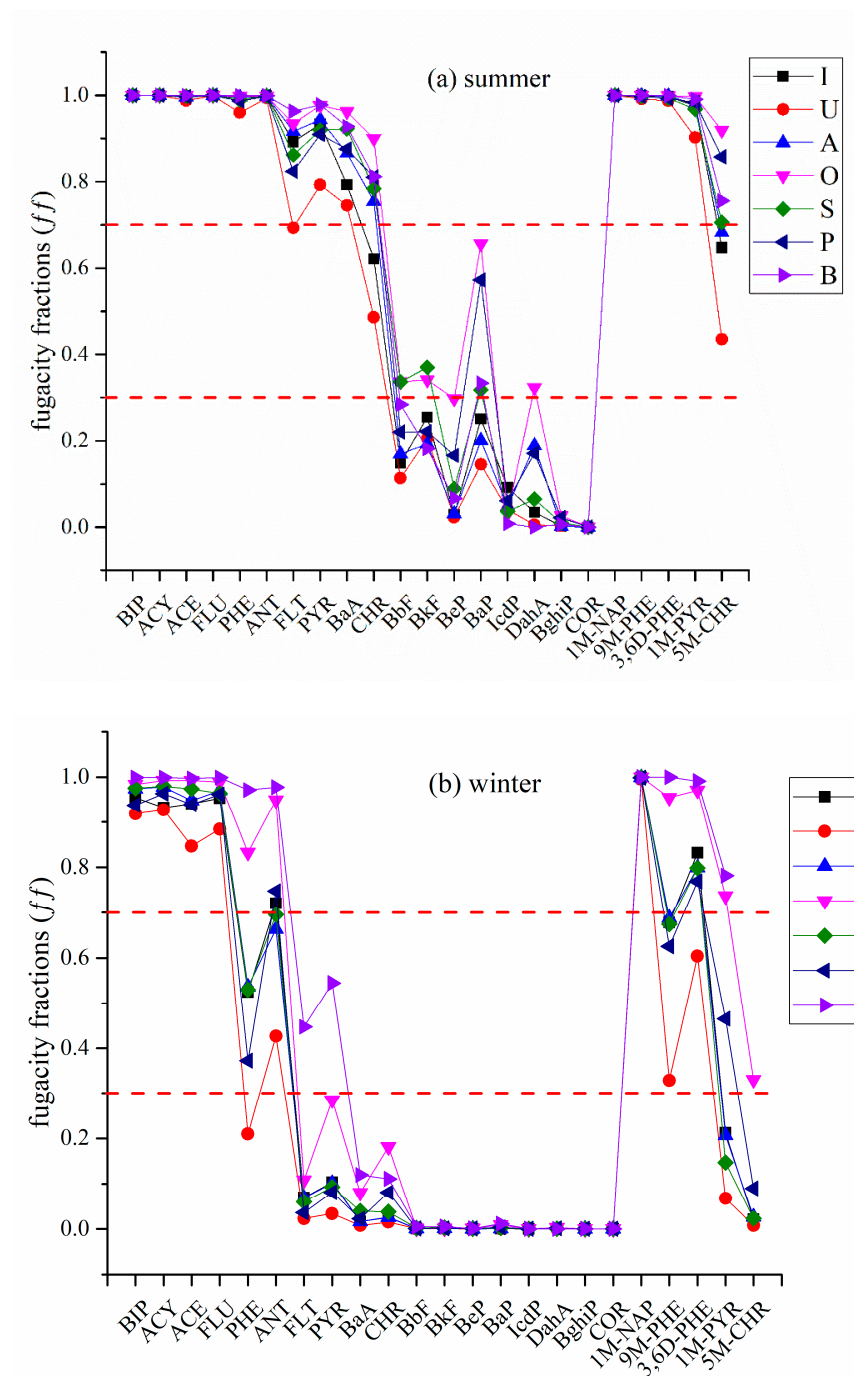

**Figure S3.** Fugacity fractions (ff) for individual PAHs and APAHs in industrial (I), urban (U), agricultural (A), oil field (O), suburb (S), pump unit (P) and background (B) areas in (a) summer and (b) winter.

## References

- Ali, N., 2019. Polycyclic aromatic hydrocarbons (PAHs) in indoor air and dust samples of different Saudi microenvironments; health and carcinogenic risk assessment for the general population. *Science of The Total Environment* 696.
- Hu, Y.D.; Bai, Z.P.; Zhang, L.W.; Wang, X.; Zhang, L.; Yu, Q.C.; Zhu, T. Health risk assessment for traffic policemen exposed to polycyclic aromatic hydrocarbons (pahs) in tianjin, china. *Sci. Total Environ.* **2007**, 382, 240–250.
- Harner, T., 2021. 2021 v10 Template for calculating PUF and SIP disk sample air volumes April28.
- Peng, C.; Chen, W.P.; Liao, X.L.; Wang, M.E.; Ouyang, Z.Y.; Jiao, W.T.; Bai, Y. Polycyclic aromatic hydrocarbons in urban soils of beijing: Status, sources, distribution and potential risk. *Environ. Pollut.* **2011**, 159, 802–808.
- USEPA, 2002. Supplemental guidance for developing soil screening levels for superfund sites. Office of Emergency and Remedial Response, Washington DC.
- USEPA, 2011. Exposure Factors Handbook: 2011 Edition (Chapter 5-Soil and Dust Ingestion). U.S. Environmental Protection Agency, Washington DC.
